# Supplementary material for: Comparative Effectiveness of Manual Therapy, Exercise Therapy, and Combined Therapy for Chronic Low Back Pain: A Comprehensive Retrospective Cohort Study
Source: Research Square preprint supplement (doi:10.21203/rs.3.rs-7720973/v1), 2025-11-14
Supplement: Supplementary file 1 [file Table S1.docx]

### Table S1. Comparison of Included vs. Excluded Patients

| Characteristic | Included Patients (n = 302) | Excluded Patients (n = 77) | p-value |
| --- | --- | --- | --- |
| Age (years), mean ± SD | 45.9 ± 12.9 | 46.2 ± 12.8 | 0.888 |
| Female, n (%) | 187 (62.0) | 45 (58.4) | 0.888 |
| BMI (kg/m²), mean ± SD | 27.9 ± 4.7 | 27.3 ± 4.8 | 0.431 |
| Pain duration (weeks), mean ± SD | 25.3 ± 4.2 | 24.5 ± 5.0 | 0.197 |

### *No significant differences were observed between included and excluded patients, indicating that missing data were likely random and not systematically biased.*
