# Supplementary material for: Comparative Effectiveness of Manual Therapy, Exercise Therapy, and Combined Therapy for Chronic Low Back Pain: A Comprehensive Retrospective Cohort Study
Source: Research Square preprint supplement (doi:10.21203/rs.3.rs-7720973/v1), 2025-11-14
Supplement: Supplementary file 2 [file Table S2.docx]

**Table S2. Missing Data Pattern by Outcome**

| Outcome | Total Eligible (n) | Complete Data (n) | Missing Data (n) | Missing (%) |
| --- | --- | --- | --- | --- |
| VAS Pain Scores | 332 | 328 | 4 | 1.3% |
| ODI Functional Scores | 332 | 326 | 6 | 2.0% |
| Medication Use | 332 | 302 | 30 | 9.0% |
| Pain Recurrence | 332 | 302 | 30 | 9.0% |
| Follow-up Duration | 332 | 251 | 81 | 24.4% |

*Missing data patterns were examined and found to be missing at random (MAR) with no systematic differences across treatment groups.*
